# Supplementary figures and images for: Thermodynamics of the hydration equilibrium derived from the luminescence spectra of the solid state for the case of the Eu–EDTA system
Source: Royal Society of Chemistry journal article supplement (doi:10.1039/c5cp02429c), 2015-01-01

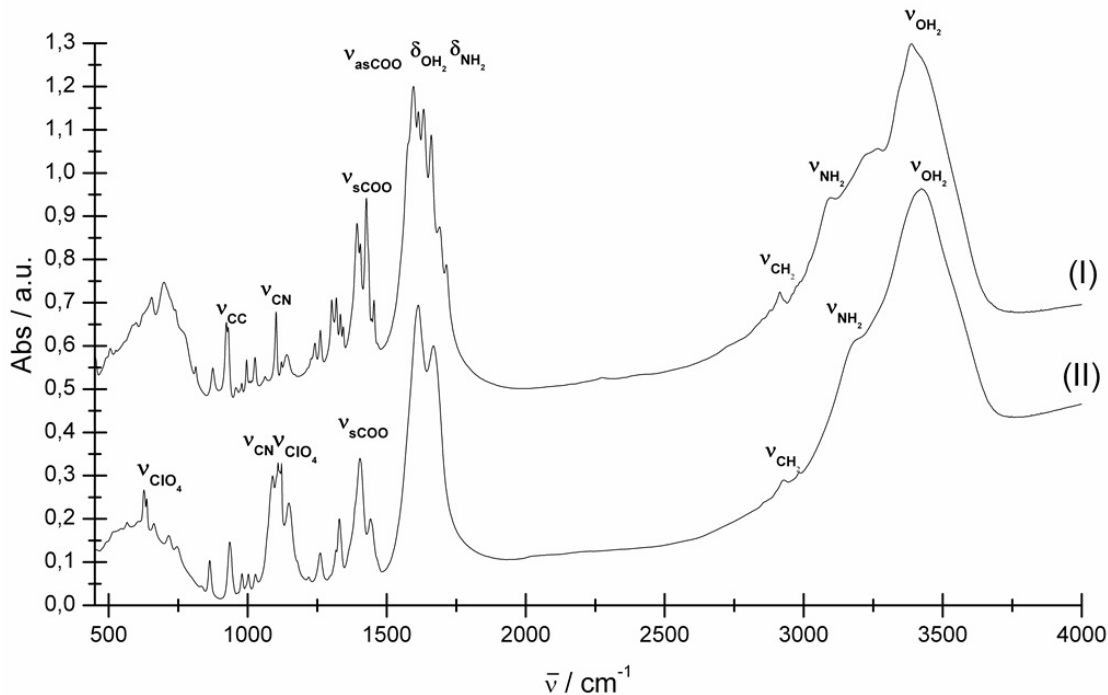

Supplement: c5cp02429c4.pdf [file c5cp02429c4.pdf]

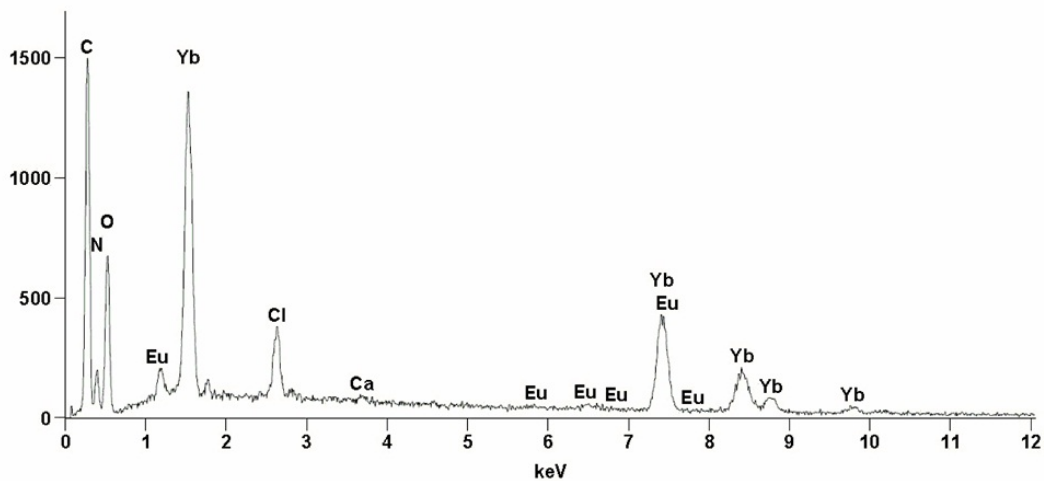

Supplement: c5cp02429c5.pdf [file c5cp02429c5.pdf]

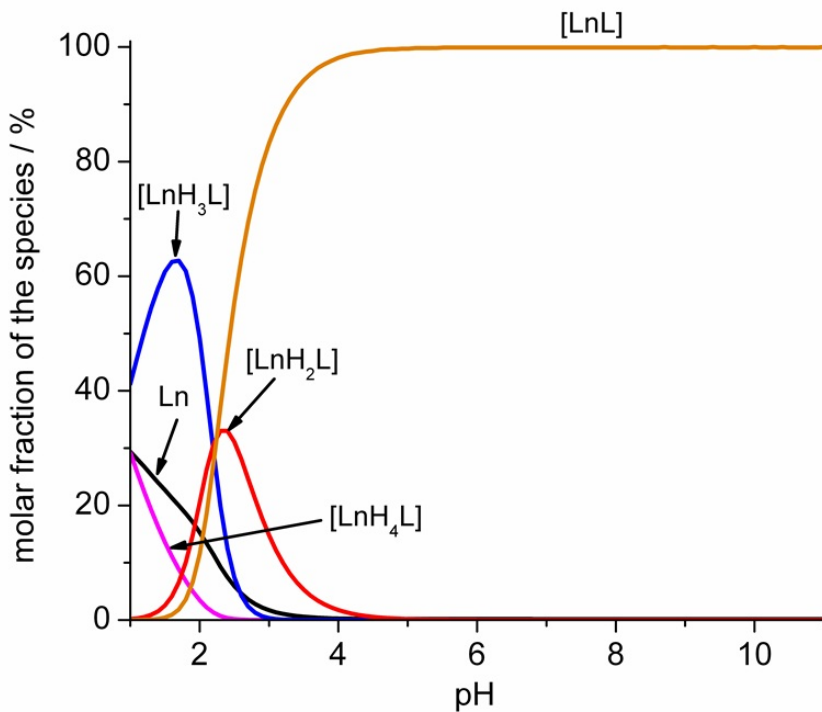

Supplement: c5cp02429c7.pdf [file c5cp02429c7.pdf]
